# Supplementary material for: Bax Inhibitor-1-Mediated Inhibition of Mitochondrial Ca2+ Intake Regulates Mitochondrial Permeability Transition Pore Opening and Cell Death
Source: PubMed Central journal article supplement — Sci Rep. 2014 Jun 5;4:5194. doi: 10.1038/srep05194 (PMC4046133; doi:10.1038/srep05194), 2014-06-05

# **Bax Inhibitor-1-Mediated Inhibition of Mitochondrial Ca<sup>2+</sup> Intake Regulates Mitochondrial Permeability Transition Pore Opening and Cell Death**

**Geum-Hwa Lee<sup>1</sup>, Hwa-Young Lee<sup>1</sup>, Bo Li<sup>1</sup>, Hyung-Ryong Kim<sup>2</sup>, Han-Jung Chae<sup>1¶</sup>**

<sup>1</sup>Department of Pharmacology and Cardiovascular Research Institute, Medical School, Chonbuk National University, Jeonju, 561-181, Republic of Korea; <sup>2</sup>Department of Dental Pharmacology and Wonkwang Dental Research Institute, School of Dentistry, Wonkwang University, Iksan, 570-749, Republic of Korea.

To whom correspondence should be addressed: Han-Jung Chae, Ph.D.; Department of Pharmacology, School of Medicine, Chonbuk National University; Jeonju, 560-182; Republic of Korea; Tel: 82-63-270-3092; Fax: 82-63-275-2855; E-mail: [hjchae@chonbuk.ac.kr](mailto:hjchae@chonbuk.ac.kr)

## **Supplementary Figure 1**

Ca<sup>2+</sup> induces cytochrome c release from mitochondria more potently in BI-1<sup>-/-</sup> liver tissues than in <sup>+/+</sup> tissues. Mitochondria from BI-1<sup>-/-</sup> liver and BI-1<sup>+/+</sup> liver were incubated with 100 μM CaCl<sub>2</sub> for various times (0, 10, 30, and 60 min). Absorbance at 540 nm was measured after incubation at 30°C. The data shown represent the mean ± S.E. (n = 4). \**p* < 0.05 versus Ca<sup>2+</sup>-exposed mitochondria from BI-1<sup>+/+</sup> tissue (A). The released cytochrome c in supernatants was detected by western blotting with anti-cytochrome c antibody (B). Sup, supernatants.

## **Supplementary Figure 2**

A549/Neo and A549/BI-1 cells were treated with 5 μM thapsigargin (arrow) and analyzed for Rhod II AM fluorescence (upper) and erAEQ luminescence (lower), respectively (A). A549/Neo and A549/BI-1 were loaded with Fura2-AM and treated with the mitochondrial inhibitor CCCP (1 μM). Representative Ca<sup>2+</sup> traces are shown. Individual cells were imaged (n = 16) and their fluorescence intensities (Fura2) recorded; the peaks of Ca<sup>2+</sup> release were also shown (B). Mitochondria from A549/Neo and A549/BI-1 were loaded with 1 μM Rhod II AM and treated with 2 mM CaCl<sub>2</sub>. Rhod II fluorescence was monitored (C). A549/Neo and A549/BI-1 cells were treated with 5 μM thapsigargin in the presence or absence of 5 μM CsA or 1 μM Ru360 for 48 hrs. Cell viability was measured by trypan blue exclusion (D) A549/Neo and A549/BI-1 cells were treated with 5 μM thapsigargin in the presence or absence of 100 μM diazoxide, 500 μM 5-HD, 100 μM NS1619, or 2 μM paxilline for 48 hrs. Cell viability was measured by trypan blue exclusion (E). \*, *p* < 0.05 versus thapsigargin-treated A549/Neo; #, *p* < 0.05 versus thapsigargin-treated A549/BI-1. [Ca<sup>2+</sup>]<sub>i</sub>, intracellular Ca<sup>2+</sup>; Tg, thapsigargin; CCCP, carbonylcyanide m-chlorophenylhydrazone; A549/Neo, neomycin-resistant pcDNA3-transfected A549 cells; A549/BI-1, HA-BI-1-pcDNA3-transfected A549 cells.

### Supplementary Figure 3

These experiments used HeLa cells in which BI-1 expression was conditionally driven using a doxycycline-inducible system. Cells were treated with 5  $\mu$ M thapsigargin (arrow) and loaded with Rhod II AM or transfected with erAEQ and the fluorescence (upper) and erAEQ luminescence (lower) was monitored (A). Doxycycline-treated or non-treated HeLa-Tet-on BI-1 cells were loaded with Fura2-AM and exposed to the mitochondrial inhibitor CCCP (1  $\mu$ M). Representative  $\text{Ca}^{2+}$  traces are shown with or without doxycycline. Individual cells were imaged ( $n = 15$ ) and their fluorescence intensities (Fura2) were recorded; the peaks of  $\text{Ca}^{2+}$  release are also shown (B). Mitochondria from doxycycline-treated or non-treated HeLa-Tet-on BI-1 cells were loaded with 1  $\mu$ M Rhod II AM and treated with 2 mM  $\text{CaCl}_2$ . Rhod II fluorescence was monitored (C). Cells were treated with 5  $\mu$ M thapsigargin in the presence or absence of 5  $\mu$ M CsA or 1  $\mu$ M Ru360 for 48 hrs. Cell viability was measured by trypan blue exclusion (D). Cells were treated with 5  $\mu$ M thapsigargin in the presence or absence of 100  $\mu$ M diazoxide, 500  $\mu$ M 5-HD, 100  $\mu$ M NS1619, or 2  $\mu$ M paxilline for 48 hrs. Cell viability was measured by trypan blue exclusion (E). \*,  $p < 0.05$  versus thapsigargin-treated without doxycycline; #,  $p < 0.05$  versus with doxycycline.  $[\text{Ca}^{2+}]_i$ , intracellular  $\text{Ca}^{2+}$ ; Tg, thapsigargin; CCCP, carbonylcyanide *m*-chlorophenylhydrazon; Con, Doxycycline-non-treated; BI-1, Doxycycline-treated.

### Supplementary Figure 4

Mitochondrial membrane potential in HT1080/Neo and HT1080/BI-1 cells was measured by JC-1 (5, 5', 6, 6'-tetrachloro-1, 1', 3, 3'-tetraethylbenzimidazol-carbocyanine iodide) staining and analyzed by PTI. The mitochondrial uncoupler, CCCP (1  $\mu$ M) was added to collapse the mitochondria membrane potential.

**A**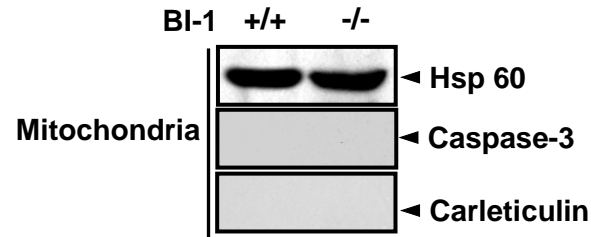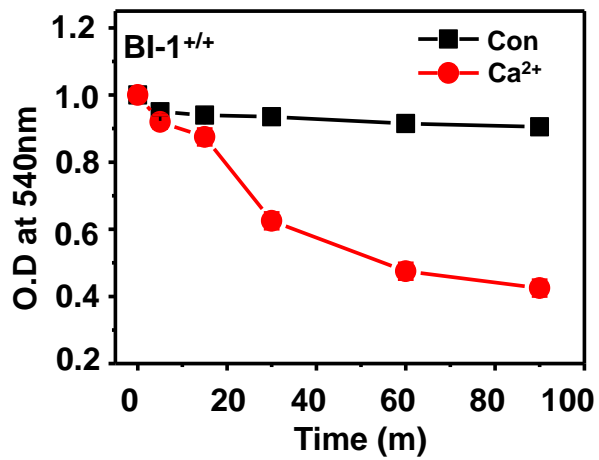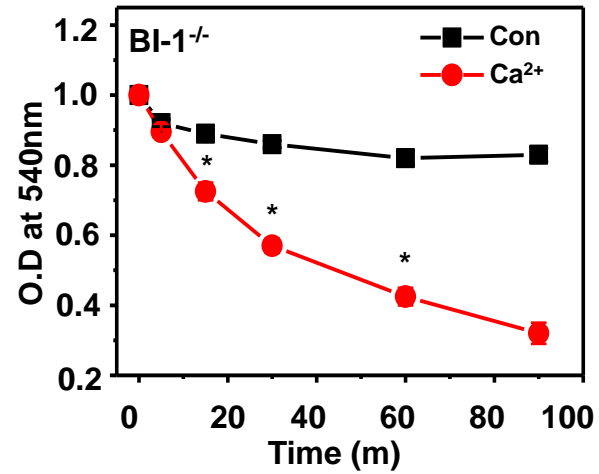**B**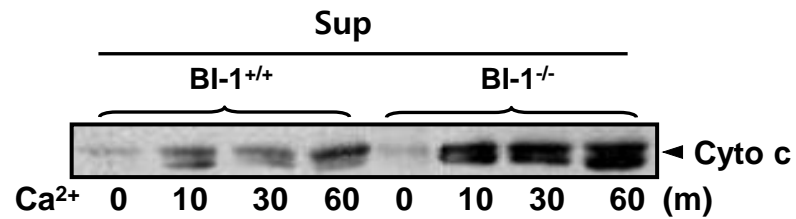

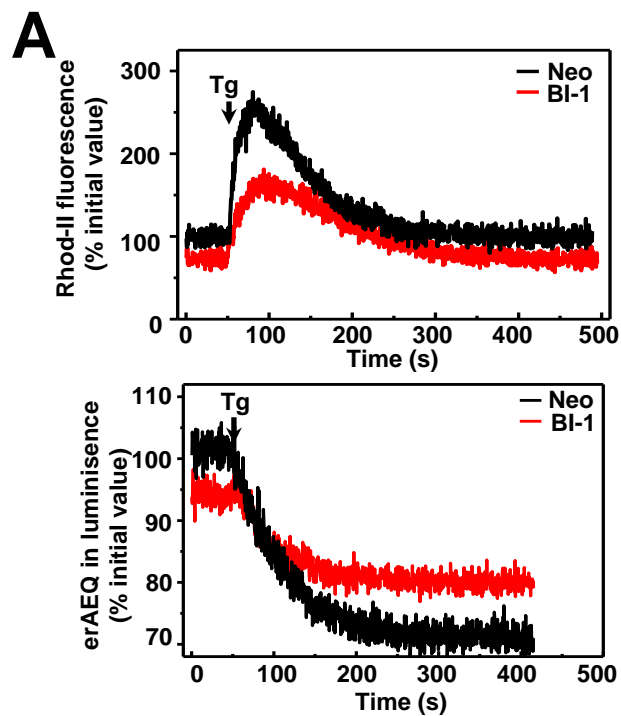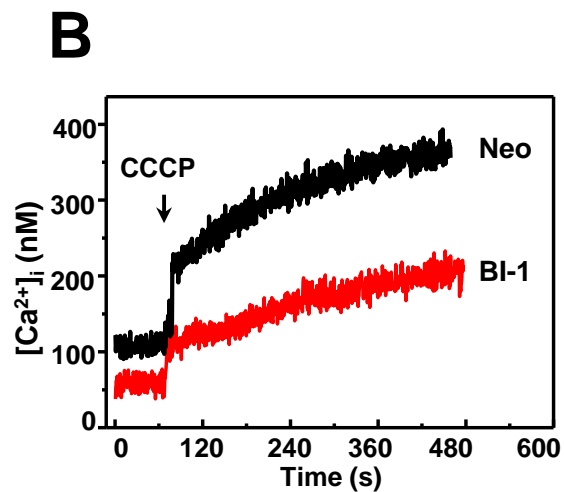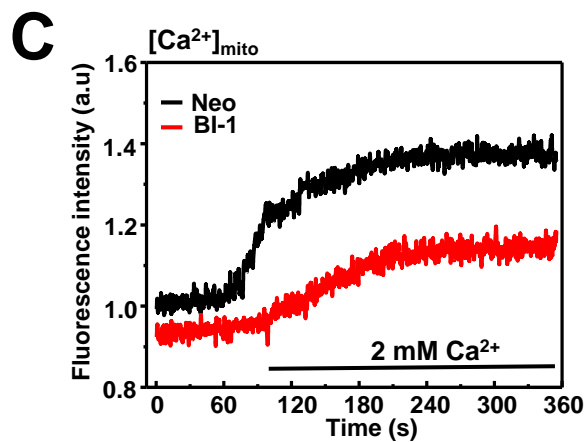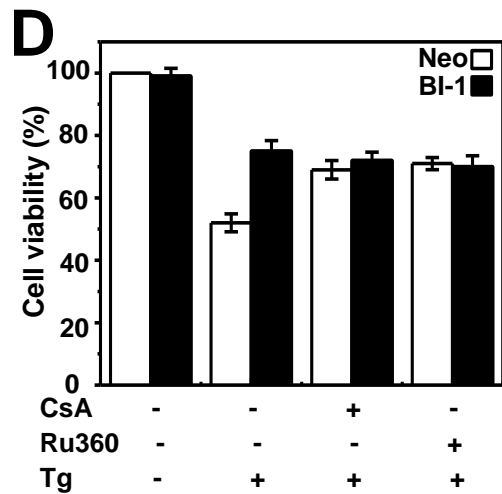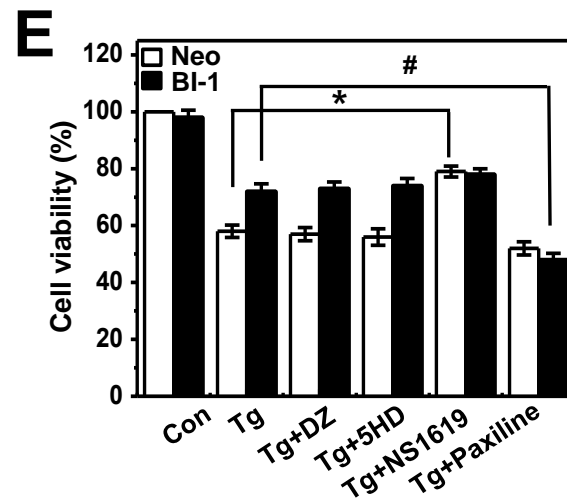

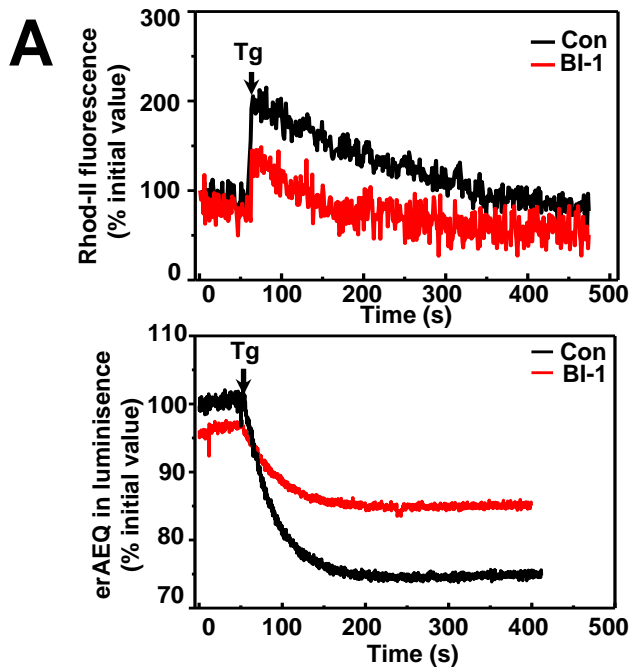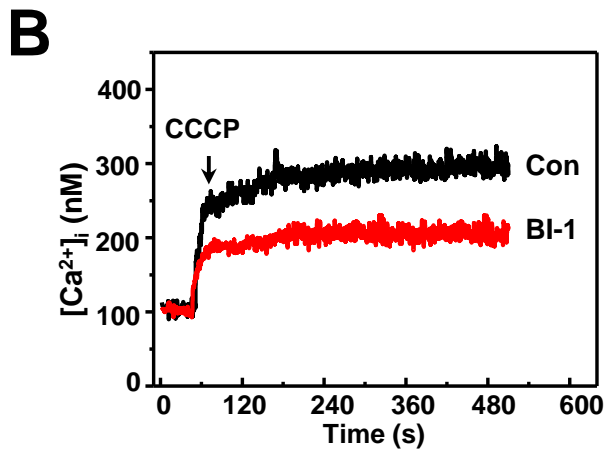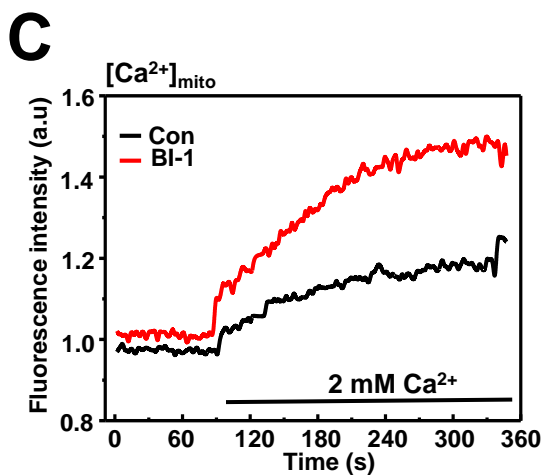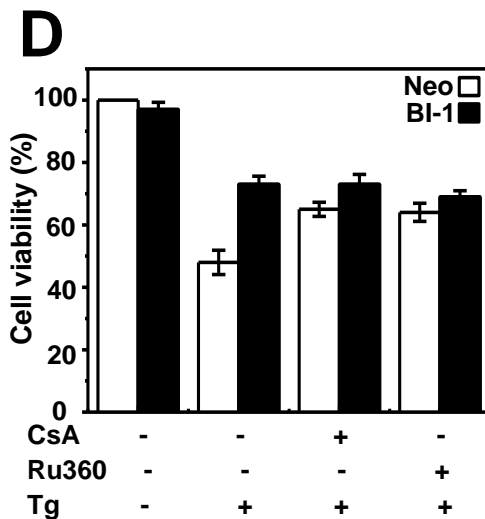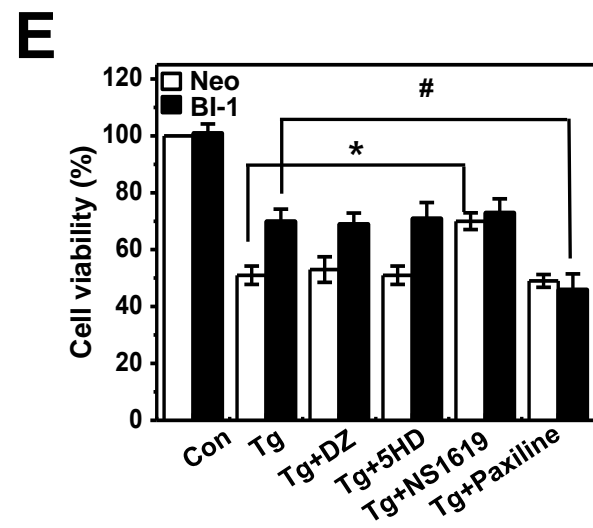

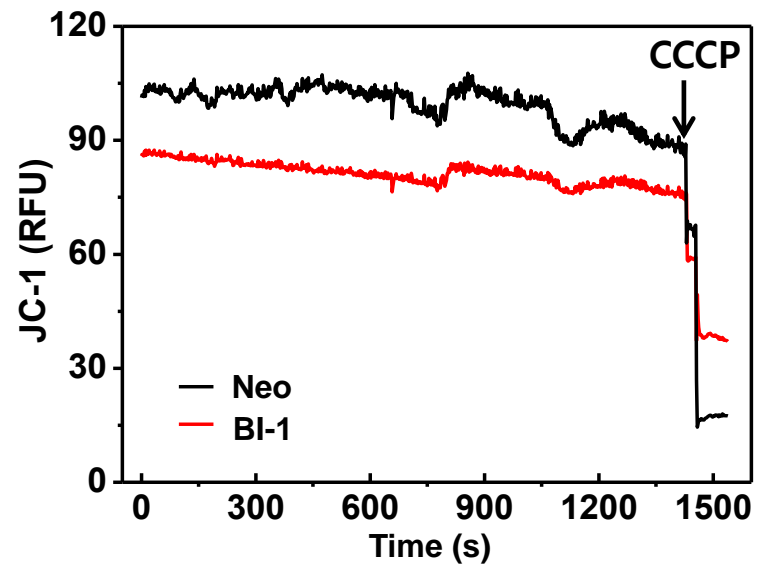

Supplement: srep05194-s1.pdf [file srep05194-s1.pdf]
